# Supplementary material for: Fe-terpyridyl complex based multiple switches for application in molecular logic gates and circuits
Source: Royal Society of Chemistry journal article supplement (doi:10.1039/c4nj00121d), 2014-01-01
Supplement: c4nj00121d1.pdf [file c4nj00121d1.pdf]

## *Supporting Information*

### **Fe-terpyridyl complex based multiple switches for application in molecular logic gate and circuit**

**Prakash Chandra Mondal,<sup>\*a,b</sup> Vikram Singh<sup>\*a</sup> and Bhaskaran Shankar<sup>a</sup>**

<sup>a</sup>Department of Chemistry, University of Delhi, Delhi – 110 007, India

<sup>b</sup>Department of Chemical Physics, Weizmann Institute of Science, Rehovot – 76100, Israel

E-mail: [mondalpc@gmail.com](mailto:mondalpc@gmail.com)

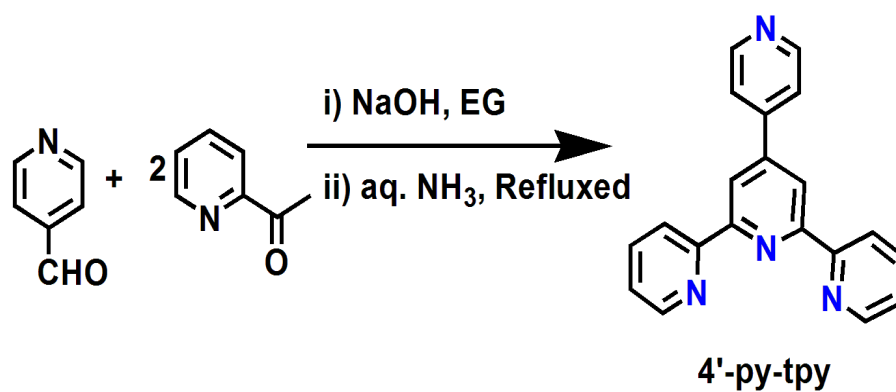

Scheme S1: Synthetic scheme for 4'-pyridyl-terpyridine (pytpy).

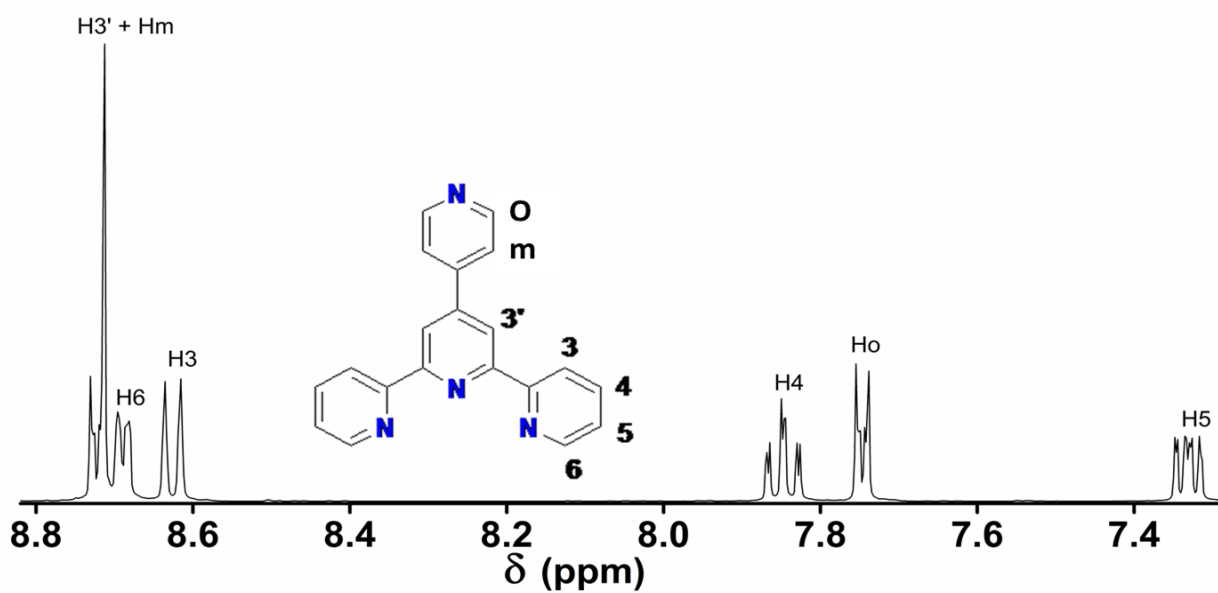

Fig.S1: <sup>1</sup>H NMR spectrum of 4'-pyridyl terpyridine (pytpy) in CDCl<sub>3</sub>.

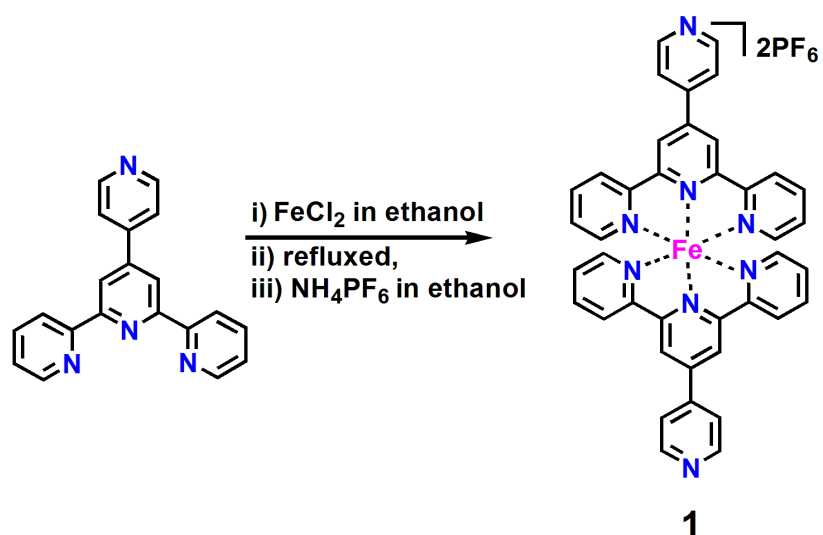

Scheme S2: Synthetic scheme for preparation of **1**.

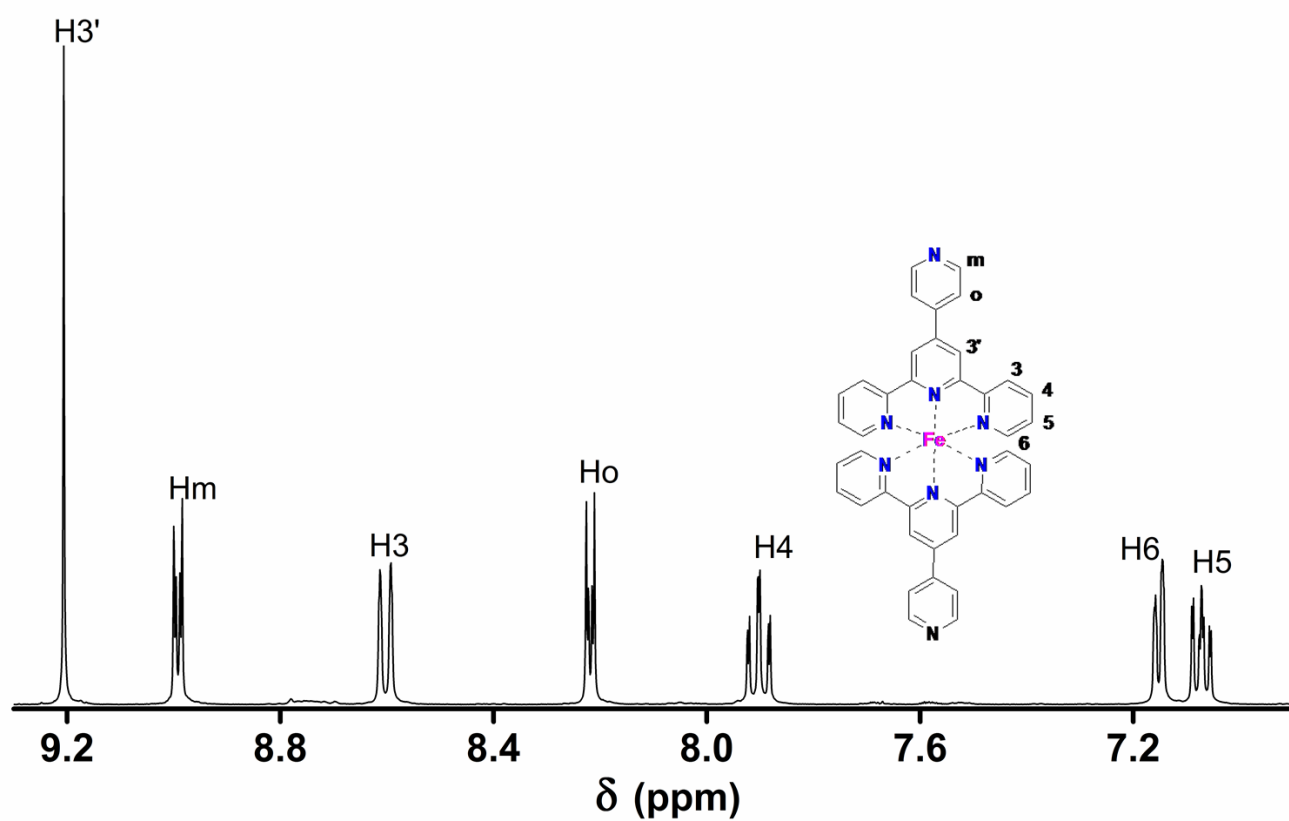

Fig. S2:  $^1\text{H}$  NMR spectrum of **1** in  $\text{CD}_3\text{CN}$ . Charge on the metal center (Fe) is +2.

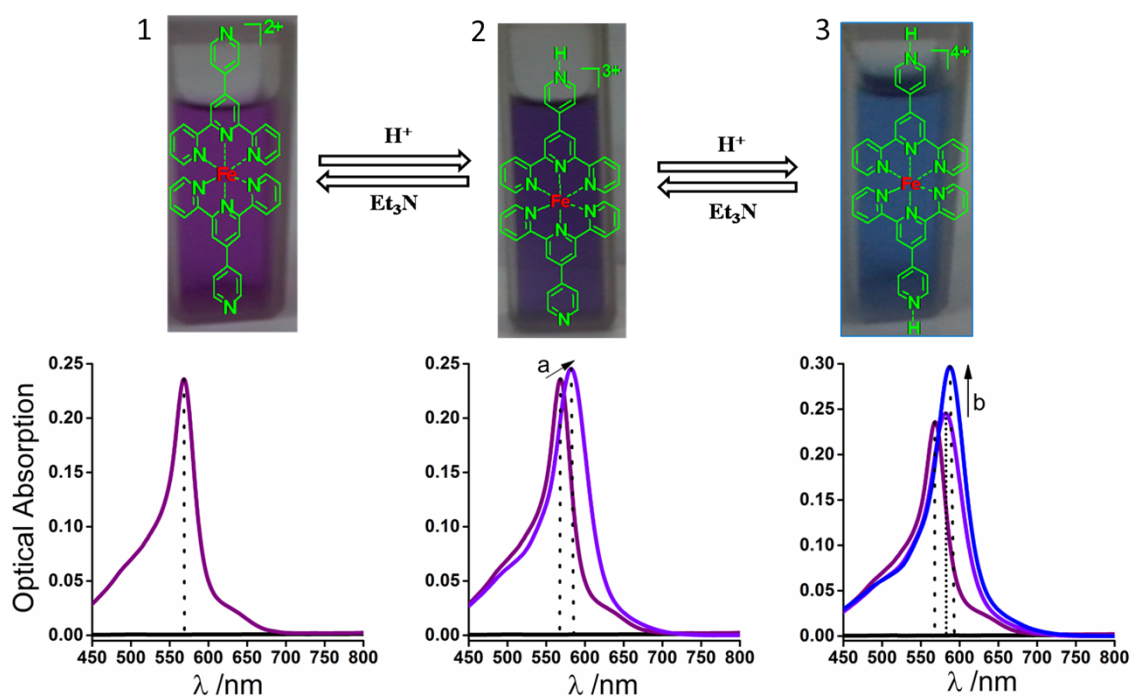

Fig. S3: (1) Native colour of **1** in dry  $\text{CH}_3\text{CN}$  and (below) corresponding UV-Vis spectrum ( $^1\text{MLCT}$ ) with  $\lambda_{\text{max}} = 569$  nm; (2) Addition of one eqv. of  $\text{H}^+$  to **1** with colour changing from purple to blue and (below) 'a' represents bathochromic shift of 13 nm to 582 nm and increase in molar absorptivity in  $^1\text{MLCT}$  of **1**; (3) Addition of another eqv. of  $\text{H}^+$  to **1** changed colour to light blue and (below) 'b' represents changes in the UV-Vis spectrum; (4) Excess of  $\text{H}^+$  could not produce any further changes. Use of  $\text{Et}_3\text{N}$  leads to original state of **1**. Black line in the UV-Vis spectra represent baseline with dry  $\text{CH}_3\text{CN}$ .

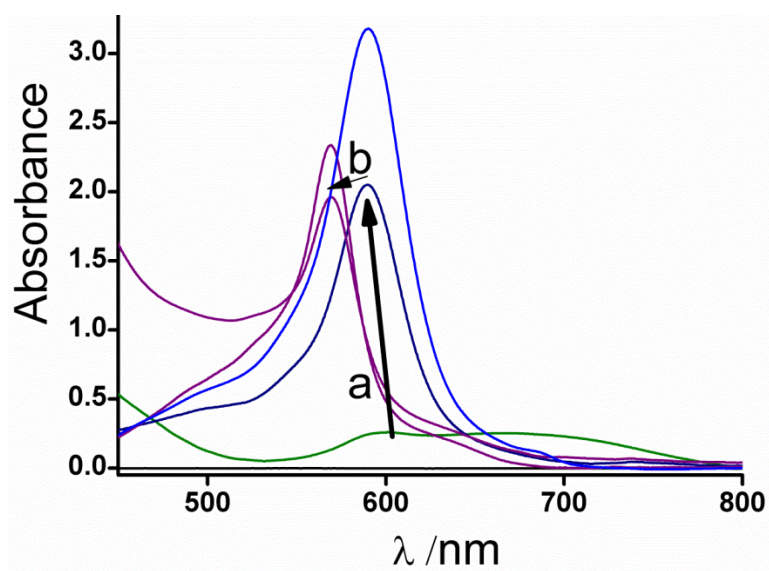

Fig. S4: Representation of getting back to original state of **1** via stepwise addition of a) 5  $\mu\text{L}$  of D.I water: Fe(III) to Fe(II); b) two eqv. of  $\text{NO}^+$ : shift the  $\lambda_{\text{max}}$  to original value of 569 nm.

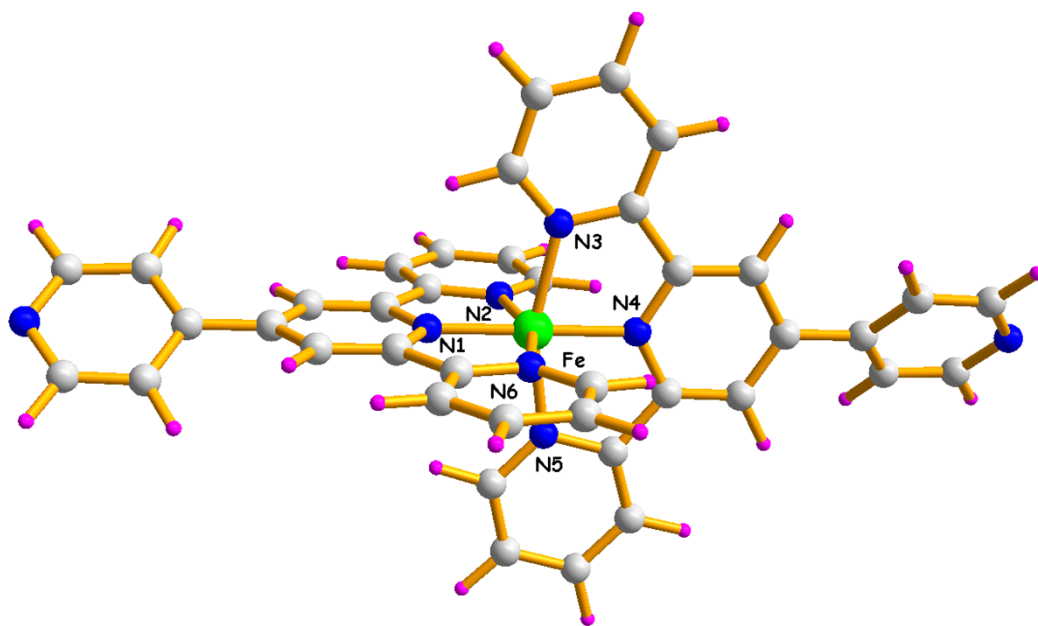

Fig. S5a: DFT-optimized structures of  $1^{2+}$

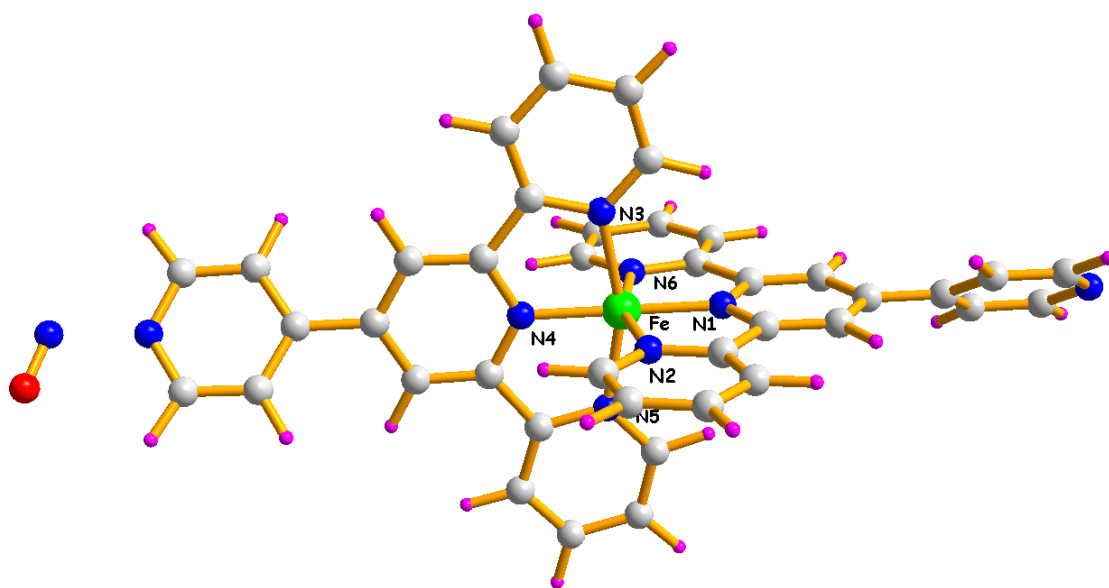

Fig. S5b: DFT-optimized structures of  $2^{3+}$

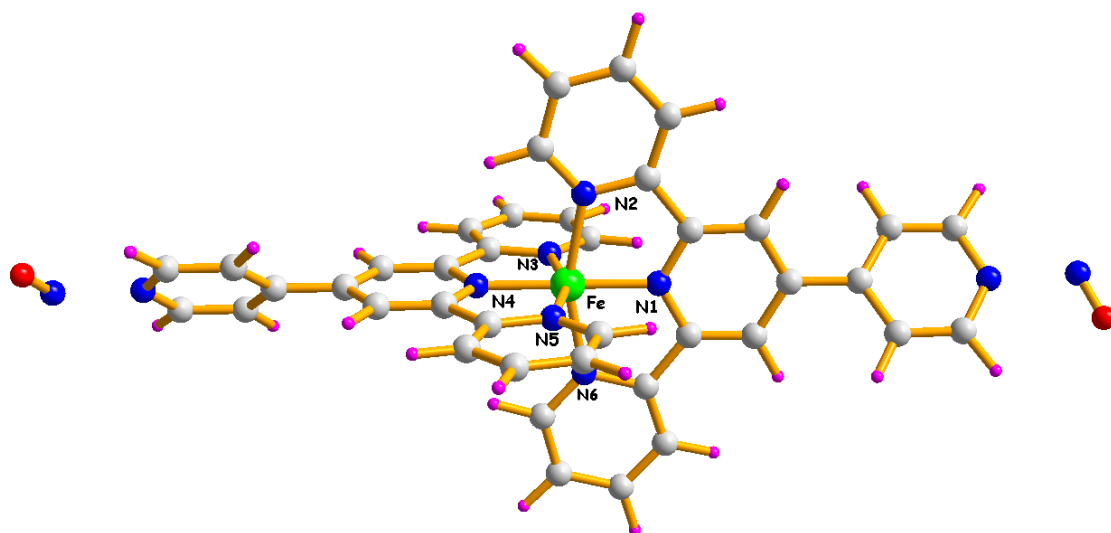

Fig. S5c: DFT-optimized structures of  $3^{4+}$

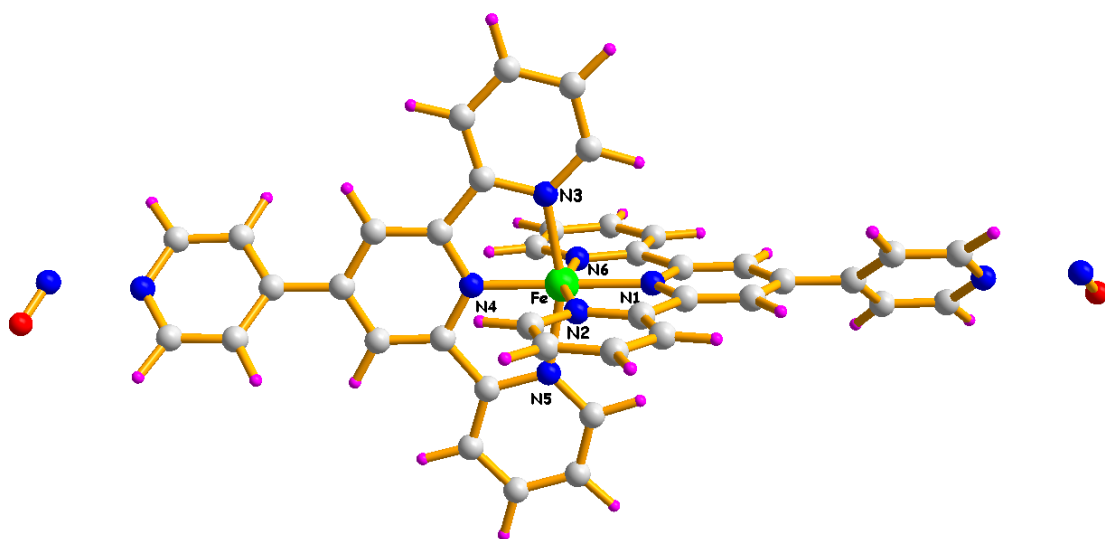

Fig. S5d: DFT-optimized structures of  $4^{5+}$

Table S1

|         | 2 <sup>+</sup> | 3 <sup>+</sup> (NO) | 4 <sup>+</sup> (NO) <sub>2</sub> | 5 <sup>+</sup> (NO) <sub>2</sub> |
|---------|----------------|---------------------|----------------------------------|----------------------------------|
| Fe–N2   | 2.0371         | 2.0415              | 2.0420                           | 2.0099                           |
| Fe–N1   | 1.9176         | 1.9236              | 1.9267                           | 1.9271                           |
| Fe–N6   | 2.0372         | 2.0414              | 2.0421                           | 2.0100                           |
| Fe–N5   | 2.0371         | 2.0337              | 2.0420                           | 2.0099                           |
| Fe–N4   | 1.9175         | 1.9143              | 1.9265                           | 1.9271                           |
| Fe–N3   | 2.0371         | 2.0336              | 2.0421                           | 2.0100                           |
| N–NO    | -              | 1.8619              | 1.9147                           | 2.0438                           |
| N–O     | -              | 1.1220              | 1.1165                           | 1.1054                           |
| ∠O–N··N | -              | 110.951             | 111.141                          | 112.360                          |
| N–NO    | -              | -                   | 1.9144                           | 2.0438                           |
| N–O     | -              | -                   | 1.1166                           | 1.1055                           |
| ∠O–N··N | -              | -                   | 111.097                          | 112.362                          |

Table S2

| M.Os | Energy (eV)    |                |                     |                                  |
|------|----------------|----------------|---------------------|----------------------------------|
|      | 2 <sup>+</sup> | 3 <sup>+</sup> | 3 <sup>+</sup> (NO) | 4 <sup>+</sup> (NO) <sub>2</sub> |
| HOMO | -10.94         | -12.1          | -15.03              | -18.52                           |
| LUMO | -7.55          | -11.82         | -12.95              | -14.89                           |

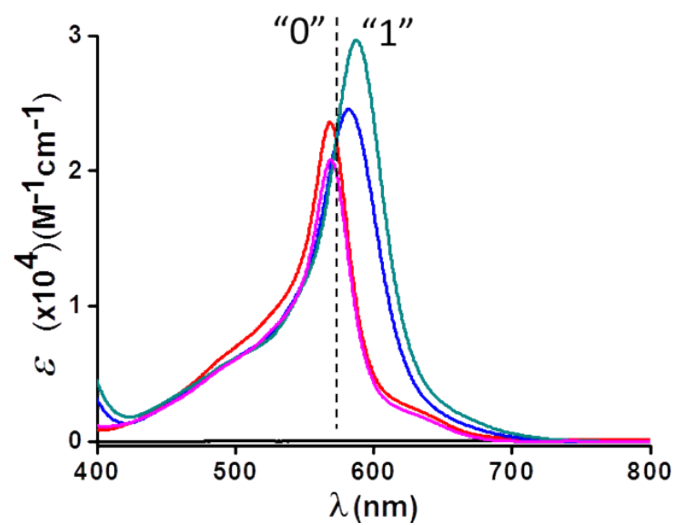

Fig. S6: Change in UV-Vis spectra of **1** upon exposing to different chemical inputs. (a) MLCT spectra of **1** (red line), (b) after addition of one eqv H<sup>+</sup> (blue line), (c) after addition of two eqv H<sup>+</sup> (grey line), (d) with more than two equivalent of Et<sub>3</sub>N (pink line) and acetonitrile baseline (black line).

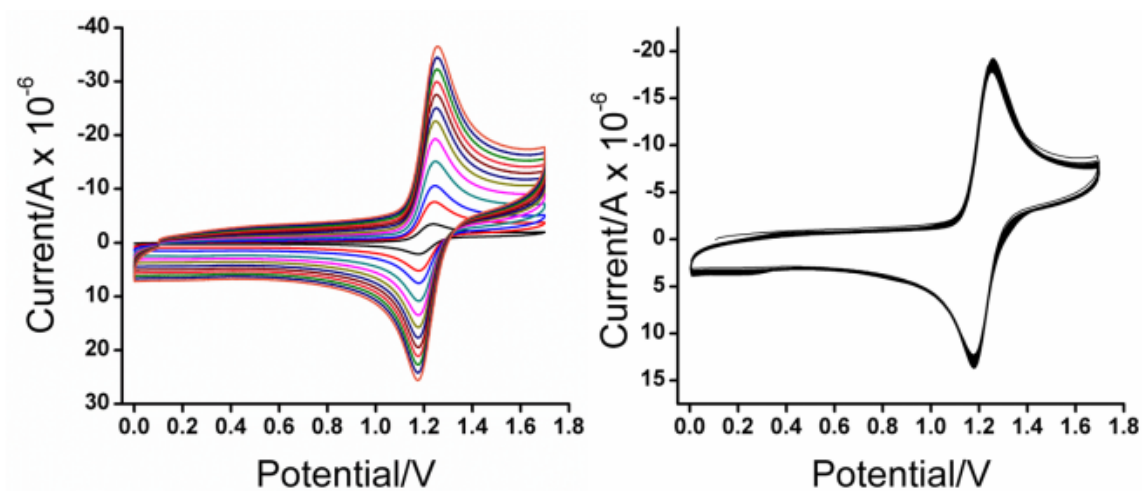

Fig. S7: (Left) cyclic voltammogram of **1** in dry CH<sub>3</sub>CN at scan rates 10 mV s<sup>-1</sup> to 1000 mV s<sup>-1</sup>. (Right) cyclic voltammograms of **1** recorded for 300 cycles at a scan rate of 300 mV s<sup>-1</sup> under the identical conditions.
